# Supplementary material for: Morphological description and molecular identification of Myxobolus dajiangensis n. sp. (Myxozoa: Myxobolidae) from the gill of Cyprinus carpio in southwest China
Source: PeerJ. 2022 Mar 4;10:e13023. doi: 10.7717/peerj.13023 (PMC8900608; doi:10.7717/peerj.13023)
Supplement: Supplemental Information 3 [file peerj-10-13023-s003.xlsx]

## Sheet: Sheet1
	SL	SD	SW	SD	PCL	SD	PCL	SD	PCW	SD	ST	PCT	PF
	14.9374		8.50649		8.55919		7.06178		2.61085		5.52455	4.03427	9
	14.3919		8.60182		8.08502		7.85044		2.05817				8
	14.4784		8.1459		8.19974		6.96983		2.22513				8
	15.254		8.27741		8.0418		7.29685		2.38203				10
	15.2128		8.27957		7.57849		6.72475		2.01237				10
	15.4121		8.49864		8.19957		7.6422		2.68717				9
	15.6698		8.36743		7.58517		7.50002		2.60494				10
	14.4806		8.99314		8.14154		7.34877		2.43847				8
	14.4587		8.88678		8.47523		7.05314		2.40802				8
	15.2901		8.30856		7.26161		7.66824		2.61085				9
	15.0899		8.33393		8.36846		8.02718		2.33422				9
	14.4151		8.08586		8.21618		8.01462		2.25292				8
	14.4251		8.89008		7.69089		7.04478		2.74582				8
	14.5522		8.2575		7.76646		6.82515		2.4686				8
	14.2512		9.08035		7.14619		7.24284		2.28716				8
	14.4007		9.06471		7.54551		6.90272		2.30742				8
	14.5806		7.77904		7.79892		7.64995		2.23209				9
	14.7675		7.47646		8.33822		7.36776		2.31418				9
	14.6767		7.83018		7.05534		7.48497		2.08072				9
	14.2883		7.55377		7.96445		7.06673		2.09564				8
	14.4053		8.0962		7.94292		7.72827		2.23214				8
	14.2883		8.06716		8.19168		7.06673		2.47013				9
	14.5001		8.18403		8.68168		7.60554		2.43845				8
	14.803		7.44413		8.13102		7.95661		2.63013				9
	14.8262		7.54442		7.74236		7.61521		2.32757				9
	14.949		7.41575		7.64219		7.38945		2.48272				10
	15.5925		7.95307		7.77628		7.24862		2.94654				10
	15.3114		7.98036		7.52707		8.09224		2.57035				9
	15.5323		8.39266		8.4711		7.97236		2.44959				10
	14.2318		8.35365		8.11146		7.94147		2.56279				8
	14.683		7.34291		8.13834		7.49392		2.32758				9
	14.808		7.81039		8.50435		7.37723		3.16287				9
	14.8636		8.29317		8.51719		7.26001		2.34253				10
	14.8187		7.46298		8.37691		7.45701		2.31918				9
	14.5862		7.8039		8.19974		7.0464		2.59443				8
	14.3143		7.60309		7.5017		7.21062		2.4512				8
	14.8667		7.31731		8.25258		7.54546		2.47011				10
	14.6718		7.82616		8.29152		7.86277		2.36565				9
	15.1563		7.35774		7.74073		7.72666		2.68574				10
	14.9403		7.46221		8.23379		7.31805		2.73303				10
	14.5645		8.05318		7.5017		7.3154		2.49366				8
	15.2046		7.53243		8.34386		8.14261		2.70449				10
	14.9534		7.62053		8.14968		7.5017		2.29396				9
	13.9109		7.94621		7.92983		7.51452		2.68138				8
	14.6916		8.47554		8.32018		6.65668		2.76835				9
	14.8389		8.14222		7.79044		7.6885		2.87176				9
	14.8303		7.82748		8.45318		7.99705		2.64638				9
	15.5709		7.81213		8.29019		7.58046		2.9307				10
	14.0492		8.32531		7.60055		6.08012		2.52463				8
	14.7194		7.75298		8.39227		7.41247		2.66827				8
	14.6054		8.38732		7.85494		7.25399		2.20935				8
	14.8082		8.13223		7.91948		7.24702		2.65806				9
	14.6914		7.8784		7.4209		7.31496		2.31417				8
	15.1984		7.86082		8.27522		6.98661		2.62128				10
	15.0285		7.85134		7.69099		7.55593		2.39508				10
	14.7491		8.14182		7.94309		7.97227		2.68717				8
	14.4668		7.16097		8.06528		7.44128		2.52616				8
	14.7464		8.15516		8.44349		7.20684		2.76839				9
	15.2674		7.41946		8.37694		7.32612		2.50759				10
	15.0111		8.08159		7.58666		7.60974		2.543				10
average	14.7848	0.388606	8.02477	0.455056	8.00569	0.376778	7.42436	0.390997	2.49222	0.227383	5.52455	4.03427	8-10
